# Supplementary material for: Gene expression signatures modulated by epidermal growth factor receptor activation and their relationship to cetuximab resistance in head and neck squamous cell carcinoma
Source: PubMed Central journal article supplement (PMC3460736; doi:10.1186/1471-2164-13-160), 2012-05-01

# CoGAPS Simulation 1

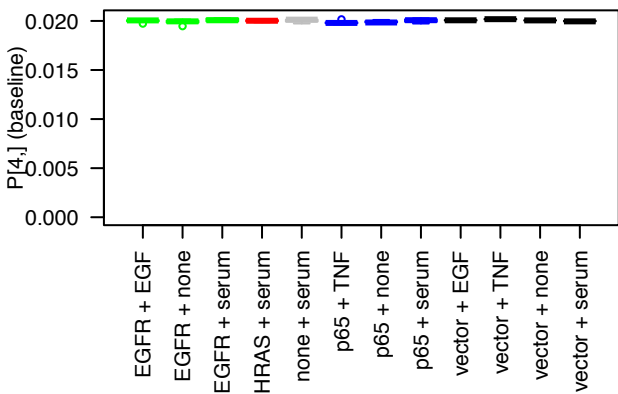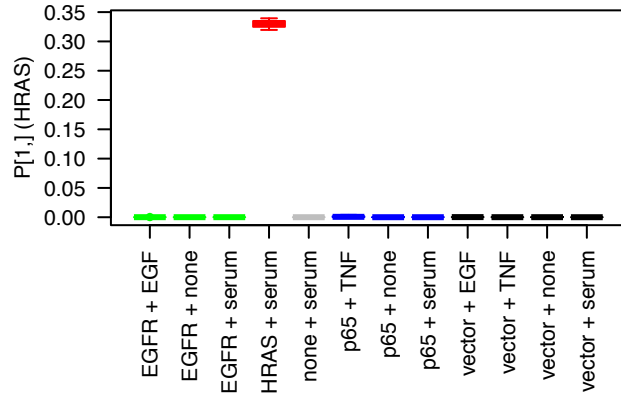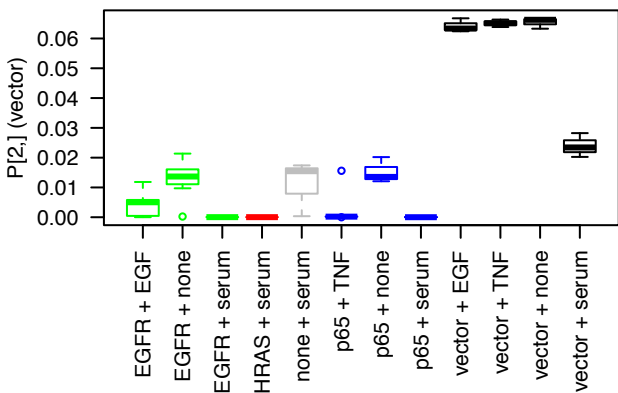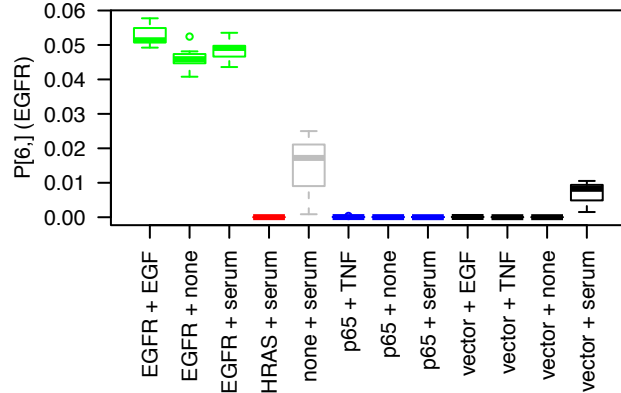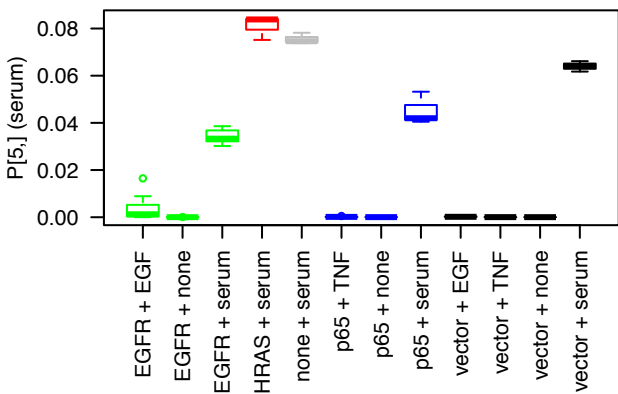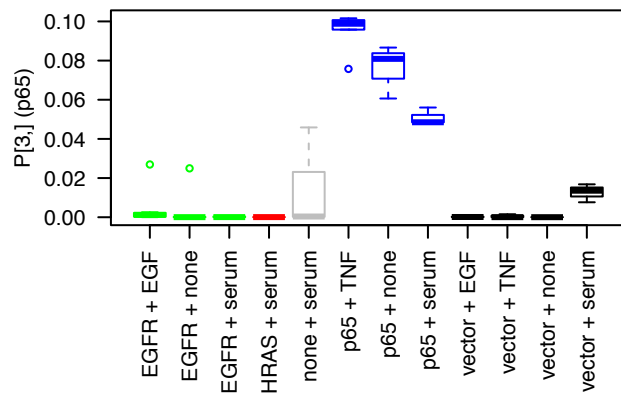

# CoGAPS Simulation 2

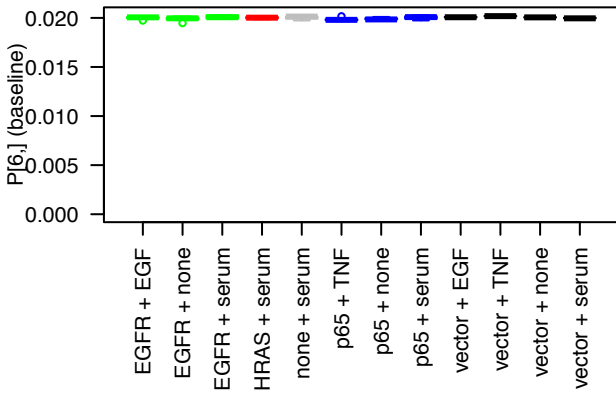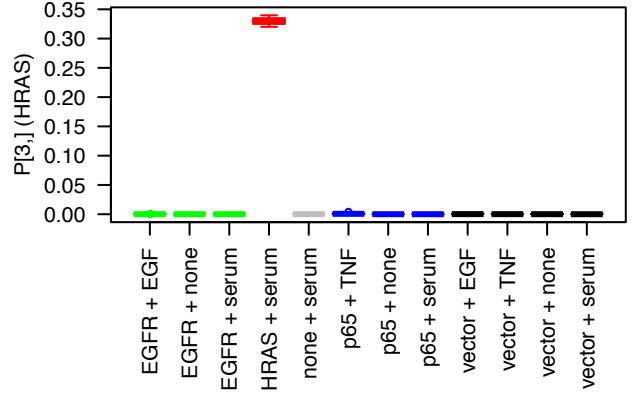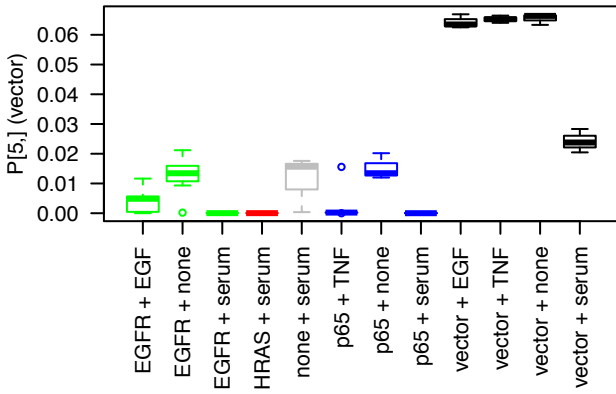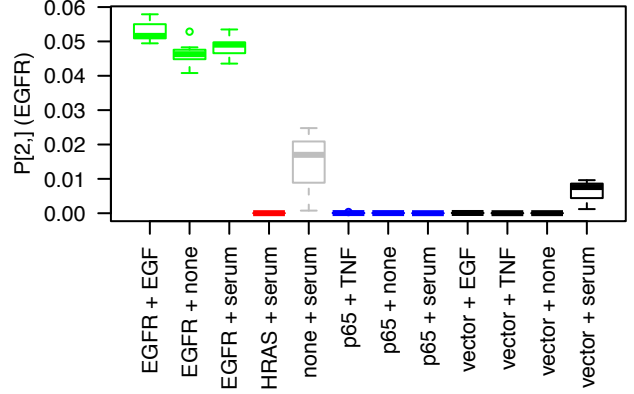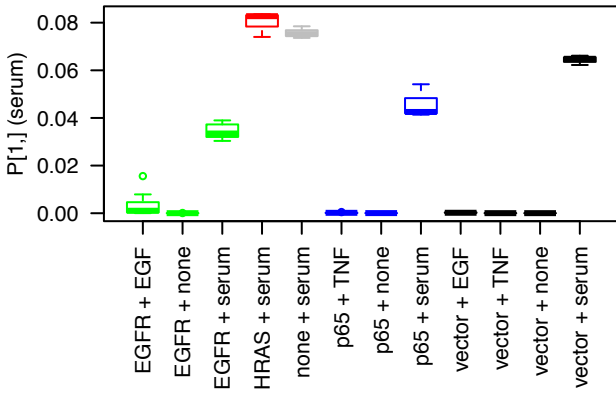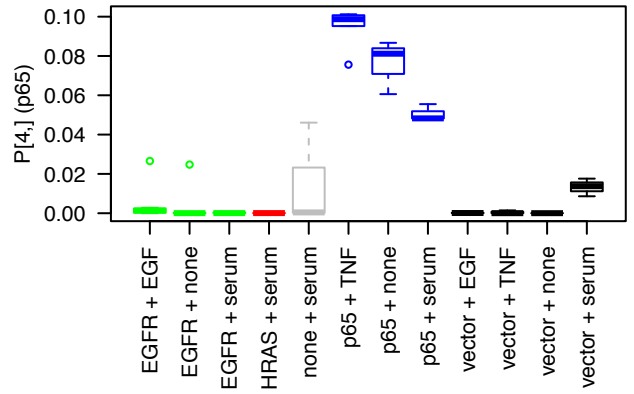

# CoGAPS Simulation 3

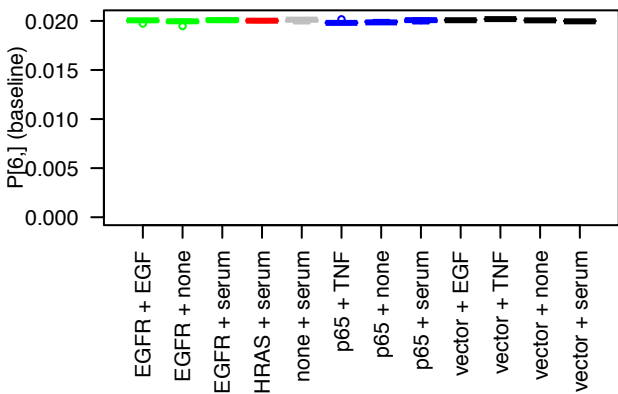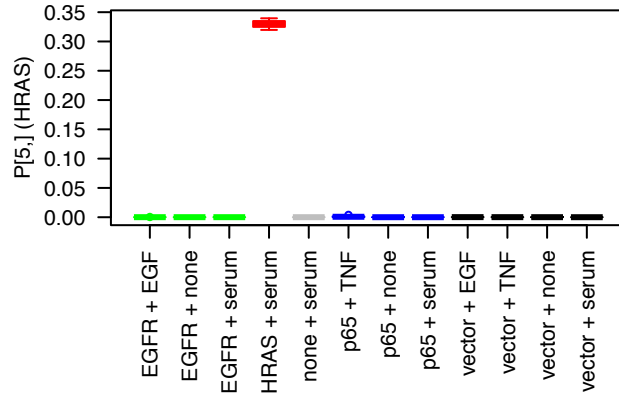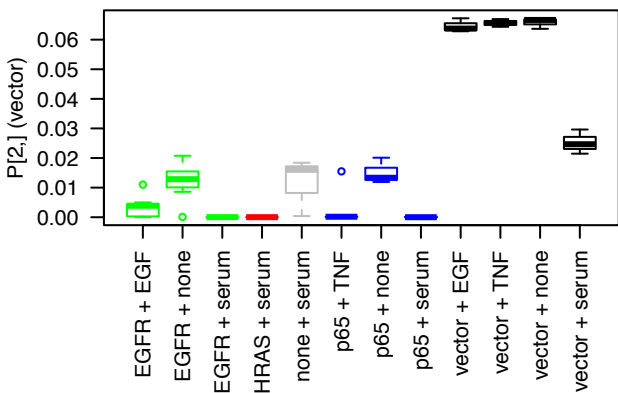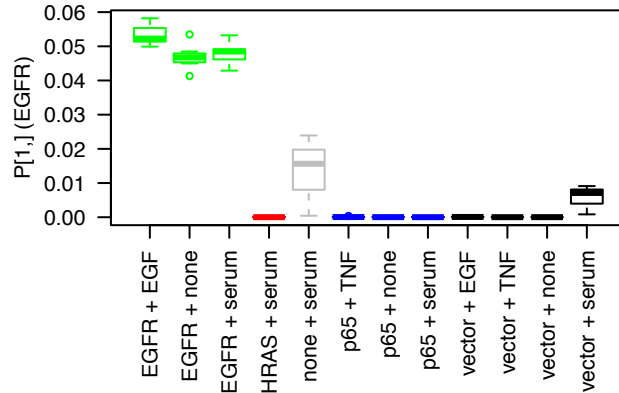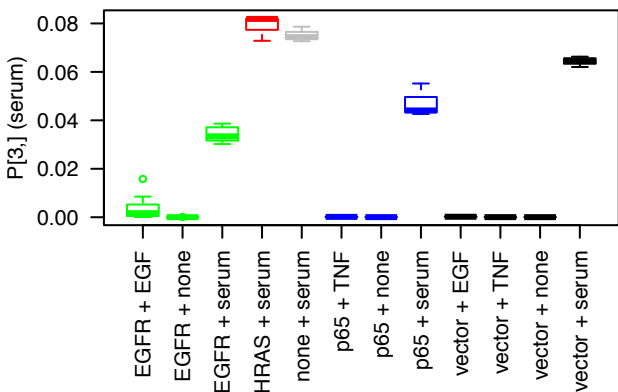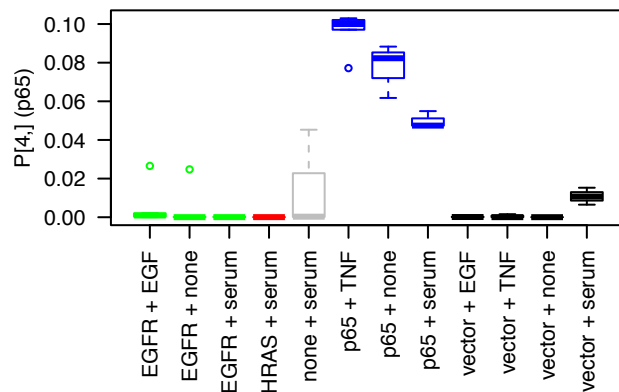

Supplement: 1471-2164-13-160-S1.pdf [file 1471-2164-13-160-S1.pdf]
