# Supplementary material for: Gene expression signatures modulated by epidermal growth factor receptor activation and their relationship to cetuximab resistance in head and neck squamous cell carcinoma
Source: PubMed Central journal article supplement (PMC3460736; doi:10.1186/1471-2164-13-160), 2012-05-01

Pathway activity

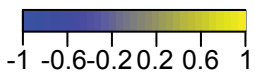

- CoGAPS Simulation 1
- CoGAPS Simulation 2
- CoGAPS Simulation 3

- STAT
- AKT
- RAS
- NOTCH
- TGFB

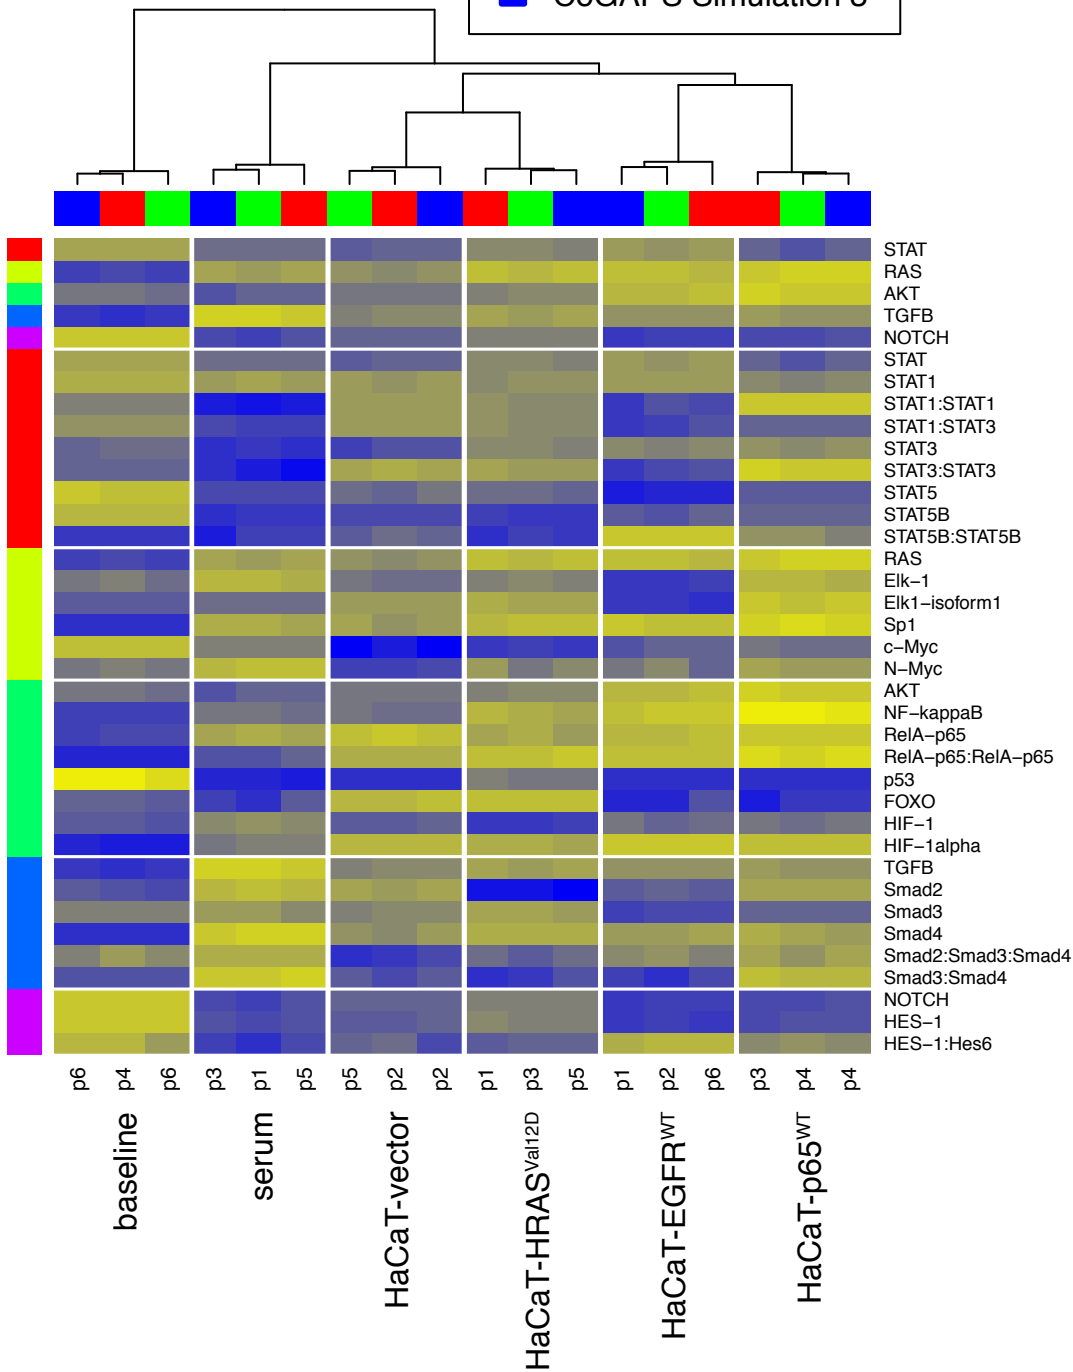

Supplement: 1471-2164-13-160-S2.pdf [file 1471-2164-13-160-S2.pdf]
